# Supplementary material
Source: MDPI journal article supplement (https://www.mdpi.com/1424-2818/13/9/444)
Supplement: s1 [file s1]

**Table S1.** Information on the studies subjected to meta-analysis.

| Article                     | Salinity regime | Stressor          | Response variable | Plant species                   | Plant family   | Growth habit | C3/C4 | Herbivore           | In-vert/vertebrate |
|-----------------------------|-----------------|-------------------|-------------------|---------------------------------|----------------|--------------|-------|---------------------|--------------------|
| Albarracin and Stiling 2006 | Brackish        | salinity          | Herbivory         | <i>Borrachia frutescens</i>     | Asteraceae     | Shrub        | C3    | Sap feeder          | Invert             |
| Albarracin and Stiling 2006 | Brackish        | Nitrogen addition | Herbivory         | <i>Borrachia frutescens</i>     | Asteraceae     | Shrub        | C3    | Sap feeder          | Invert             |
| Albarracin and Stiling 2006 | Brackish        | Salinity          | Herbivory         | <i>Borrachia frutescens</i>     | Asteraceae     | Shrub        | C3    | Gall insect         | Invert             |
| Albarracin and Stiling 2006 | Brackish        | Nitrogen addition | Herbivory         | <i>Borrachia frutescens</i>     | Asteraceae     | Shrub        | C3    | Gall insect         | Invert             |
| Alcoverro and Mariani 2004  | Saline          | Herbivory         | Productivity      | <i>Thalassodendron ciliatum</i> | Poaceae        | Grass        | C3    | Simulated herbivory |                    |
| Alcoverro and Mariani 2004  | Saline          | Herbivory         | Productivity      | <i>Halodule uninervis</i>       | Poaceae        | Grass        | C3    | Simulated herbivory |                    |
| Alcoverro and Mariani 2004  | Saline          | Herbivory         | Productivity      | <i>Syringodium isoetofolium</i> | Poaceae        | Grass        | C3    | Simulated herbivory |                    |
| Alcoverro and Mariani 2004  | Saline          | Herbivory         | Productivity      | <i>Thalassia hamprichii</i>     | Poaceae        | Grass        |       | Simulated herbivory |                    |
| Alcoverro and Mariani 2004  | Saline          | Herbivory         | Productivity      | <i>Cymodocea rotundata</i>      | Poaceae        | Grass        | C3    | Simulated herbivory |                    |
| Baldwin and Mendelsohn 1998 | Brackish        | Salinity          | Productivity      | <i>Sagittaria lancifolia</i>    | Alismataceae   | Forb/herb    | C3    |                     |                    |
| Baldwin and Mendelsohn 1998 | Brackish        | Salinity          | Productivity      | <i>Spartina patens</i>          | Poaceae        | Grass        | C4    |                     |                    |
| Baldwin and Pendleton 2003  | Freshwater      | Herbivory         | Productivity      | <i>Leersia oryzoides</i>        | Poaceae        | Grass        | C3    | Multiple herbivores |                    |
| Baldwin and Pendleton 2003  | Freshwater      | Herbivory         | Productivity      | <i>Zizania aquatica</i>         | Poaceae        | Grass        | C3    | Multiple herbivores |                    |
| Baldwin and Pendleton 2003  | Freshwater      | Herbivory         | Productivity      | <i>Bidens laevis</i>            | Asteraceae     | Forb/herb    |       |                     |                    |
| Ball and Pidsley 1995       | Saline          | salinity          | Productivity      | <i>Sonneratia lanceolata</i>    | Sonneratiaceae | Tree         | C3    |                     |                    |
| Beaulieu et al. 1996        | Freshwater      | Herbivory         | Productivity      | <i>Eriophorum scheutzeri</i>    | Poaceae        | Grass        | C3    | Geese               | Vert               |
| Beaulieu et al. 1996        | Freshwater      | Herbivory         | Productivity      | <i>Dupontia sp.</i>             | Poaceae        | Grass        | C3    | Geese               | Vert               |
| Beaulieu et al. 1996        | Freshwater      | Nitrogen addition | Productivity      | <i>Eriophorum scheutzeri</i>    | Poaceae        | Grass        | C3    |                     |                    |
| Beaulieu et al. 1996        | Freshwater      | Nitrogen addition | Productivity      | <i>Dupontia sp.</i>             | Poaceae        | Grass        | C3    |                     |                    |
| Bertness et al. 1992        | Brackish        | salinity          | Productivity      | <i>Iva frutescens</i>           | Asteraceae     | Forb/herb    | C3    |                     |                    |
| Bertness et al. 1992        | Brackish        | salinity          | Productivity      | <i>Juncus gerardi</i>           | Juncaceae      | Rush         | C3    |                     |                    |
| Bertness et al. 1992        | Brackish        | salinity          | Productivity      | <i>Salicornia europaea</i>      | Chenopidiaceae | succulent    | C3    |                     |                    |
| Bertness et al. 1992        | Brackish        | salinity          | Productivity      | <i>Atriplex patula</i>          | Chenopidiaceae | Forb/herb    | C3    |                     |                    |
| Bertness et al. 1992        | Brackish        | salinity          | Productivity      | <i>Aster tenuifolius</i>        | Asteraceae     | Forb/herb    |       |                     |                    |
| Bertness et al. 1992        | Brackish        | salinity          | Productivity      | <i>Limonium nashii</i>          | Plumbagina-    | Forb/herb    | C3    |                     |                    |

|                          |            |                   |              |                                        |                    |           |    |                     |        |
|--------------------------|------------|-------------------|--------------|----------------------------------------|--------------------|-----------|----|---------------------|--------|
| Bertness et al. 2008     | Saline     | Herbivory         | Productivity | <i>Spartina alterniflora</i>           | Poaceae            | Grass     | C4 | Sap feeder          | Invert |
| Bertness et al. 2008     | Saline     | Nitrogen addition | Productivity | <i>Spartina alterniflora</i>           | Poaceae            | Grass     | C4 |                     |        |
| Bertness et al. 2009     | Saline     | Herbivory         | Productivity | <i>Spartina alterniflora</i>           | Poaceae            | Grass     | C4 | Crab                | Invert |
| Bertness et al. 2009     | Saline     | Nitrogen addition | Productivity | <i>Spartina alterniflora</i>           | Poaceae            | Grass     | C4 |                     |        |
| Bertness et al. 2009     | Saline     | Herbivory         | Productivity | <i>Spartina alterniflora</i>           | Poaceae            | Grass     | C4 | Crab                | Invert |
| Bowdish and Stiling 1998 | Saline     | Nitrogen addition | Herbivory    | <i>Spartina alterniflora</i>           | Poaceae            | Grass     | C4 | Sap feeder          | Invert |
| Boyer and Zedler 1996    | Saline     | Nitrogen addition | Herbivory    | <i>Spartina foliosa</i>                | Poaceae            | Grass     | C4 | Scale insect        | Invert |
| Boyer et al. 2001        | Saline     | Nitrogen addition | Productivity | <i>Salicornia virginica</i>            | Chenopida-<br>ceae | Forb/herb | C3 |                     |        |
| Brewer 2003              | Saline     | Nitrogen addition | Productivity | <i>Spartina alterniflora</i>           | Poaceae            | Grass     | C4 |                     |        |
| Brown et al. 2006        | Saline     | salinity          | Productivity | <i>Spartina alterniflora</i>           | Poaceae            | Grass     | C4 |                     |        |
| Cherry et al. 2008       | Brackish   | salinity          | Productivity | <i>Schoenoplectus ameri-<br/>canus</i> | Cyperaceae         | Grass     | C3 |                     |        |
| Cherry et al. 2008       | Brackish   | salinity          | Productivity | <i>Spartina patens</i>                 | Poaceae            | Grass     | C4 |                     |        |
| Crain 2007               | Brackish   | Nitrogen addition | Productivity | <i>Spartina patens</i>                 | Poaceae            | Grass     | C4 |                     |        |
| Crain 2007               | Brackish   | salinity          | Productivity | <i>Spartina patens</i>                 | Poaceae            | Grass     | C4 |                     |        |
| Crain et al. 2004        | Brackish   | salinity          | Productivity | <i>Spartina patens</i>                 | Poaceae            | Grass     | C4 |                     |        |
| Crain et al. 2004        | Freshwater | salinity          | Productivity | <i>Typha augustifolia</i>              | Typhaceae          | Perennial | C3 |                     |        |
| Crain et al. 2004        | Saline     | salinity          | Productivity | <i>Spartina alterniflora</i>           | Poaceae            | Grass     | C4 |                     |        |
| Crain et al. 2004        | Freshwater | salinity          | Productivity | <i>Scirpus robustus</i>                | Cyperaceae         | Grass     | C3 |                     |        |
| Daehler and Strong 1995  | Saline     | Herbivory         | Productivity | <i>Spartina alterniflora</i>           | Poaceae            | Grass     | C4 | Sap feeder          | Invert |
| Daehler and Strong 1995  | Saline     | Herbivory         | Productivity | <i>Spartina alterniflora</i>           | Poaceae            | Grass     | C4 | Sap feeder          | Invert |
| Daleo and Iribarne 2009  | Saline     | Herbivory         | Productivity | <i>Spartina alterniflora</i>           | Poaceae            | Grass     | C4 | Crab                | Invert |
| Daleo et al. 2009        | Saline     | Herbivory         | Productivity | <i>Spartina alterniflora</i>           | Poaceae            | Grass     | C4 | Crab                | Invert |
| Darby and Turner 2008    | Saline     | Nitrogen addition | Productivity | <i>Spartina alterniflora</i>           | Poaceae            | Grass     | C4 |                     |        |
| Osgood and Zieman 1993   | Saline     | Salinity          | Productivity | <i>Spartina alterniflora</i>           | Poaceae            | Grass     | C4 |                     |        |
| Osgood and Zieman 1994   | Saline     | Nitrogen addition | Productivity | <i>Spartina alterniflora</i>           | Poaceae            | Grass     | C4 |                     |        |
| DeLaune et al. 2005      | Brackish   | Nitrogen addition | Productivity | <i>Spartina patens</i>                 | Poaceae            | Grass     | C4 |                     |        |
| DeLaune et al. 2005      | Brackish   | Salinity          | Productivity | <i>Spartina patens</i>                 | Poaceae            | Grass     | C4 |                     |        |
| Dormann et al. 2000      | Saline     | Herbivory         | Productivity | <i>Artemesia maritima</i>              | Asteraceae         | Forb/herb |    | Multiple herbivores | Vert   |
| Dormann et al. 2000      | Saline     | Herbivory         | Productivity | <i>Plantago maritima</i>               | Plantaginaceae     | Forb/herb | C3 | Multiple herbivores | Vert   |
| Dormann et al. 2000      | Saline     | Herbivory         | Productivity | <i>Atriplex portulacoides</i>          | Chenopida-<br>ceae | Forb/herb | C3 | Multiple herbivore  | Vert   |
| Evers et al. 1998        | Freshwater | Herbivory         | Productivity | marsh plants combined                  |                    |           |    | Waterfowl           | Vert   |
| Evers et al. 1998        | Freshwater | Herbivory         | Productivity | marsh plants combined                  |                    |           |    | Nutria              | Vert   |
| Ewing et al. 1995        | Saline     | Nitrogen addition | Productivity | <i>Spartina alterniflora</i>           | Poaceae            | Grass     | C4 |                     |        |
| Farina et al. 2009       | Saline     | salinity          | Productivity | <i>Sarcocornia fruticosa</i>           | Chenopida-         | Succulent | C4 |                     |        |

|                               |            |                   |              |                                    |                 |           |    |              |        |
|-------------------------------|------------|-------------------|--------------|------------------------------------|-----------------|-----------|----|--------------|--------|
| Farina et al. 2009            | Brackish   | salinity          | Productivity | <i>Spartina densiflora</i>         | ceae<br>Poaceae | Grass     | C4 |              |        |
| Farina et al. 2009            | Brackish   | salinity          | Productivity | <i>Schoenoplectus californicus</i> | Cyperaceae      | Grass     | C4 |              |        |
| Farnsworth and Meyer-son 2003 | Brackish   | salinity          | Productivity | <i>Phragmites australis</i>        | Poaceae         | Grass     | C3 |              |        |
| Farnsworth and Meyer-son 2004 | Brackish   | salinity          | Productivity | <i>Typha augustifolia</i>          | Typhaceae       | Perenial  | C3 |              |        |
| Feller and Chamberlain 2007   | Saline     | Nitrogen addition | Productivity | <i>Rhizophora mangle</i>           | Rhi-zophoraceae | Tree      | C3 |              |        |
| Feller and Chamberlain 2007   | Saline     | Nitrogen addition | Herbivory    | <i>Rhizophora mangle</i>           | Rhi-zophoraceae | Tree      | C3 | Crab         | Invert |
| Feller and Chamberlain 2007   | Saline     | Nitrogen addition | Herbivory    | <i>Rhizophora mangle</i>           | Rhi-zophoraceae | Tree      | C3 | Leaf miner   | Invert |
| Feller and Chamberlain 2007   | Saline     | Nitrogen addition | Herbivory    | <i>Rhizophora mangle</i>           | Rhi-zophoraceae | Tree      | C3 | Leaf chewers | Invert |
| Feller and Chamberlain 2007   | Saline     | Nitrogen addition | Herbivory    | <i>Rhizophora mangle</i>           | Rhi-zophoraceae | Tree      | C3 | Budmoth      | Invert |
| Finke and Denno 2005          | Saline     | Herbivory         | Productivity | <i>Spartina alterniflora</i>       | Poaceae         | Grass     | C4 | Planthopper  | Invert |
| Ford and Grace 1998           | Brackish   | Herbivory         | Productivity | <i>marsh plants combined</i>       | Poaceae         | Grass     |    |              | Vert   |
| Frost et al. 2009             | Freshwater | Nitrogen addition | Productivity | <i>Zizaniopsis miliacea</i>        | Poaceae         | Grass     | C4 |              | Vert   |
| Furbish and Albano 1994       | Saline     | Herbivory         | Productivity | <i>Spartina alterniflora</i>       | Poaceae         | Grass     | C4 |              | Vert   |
| Furbish and Albano 1994       | Saline     | Herbivory         | Productivity | <i>Distichlis spicata</i>          | Poaceae         | Grass     | C4 |              | Vert   |
| Gauthier et al. 2004          | Freshwater | Herbivory         | Productivity | <i>Dupontia fisheri</i>            | Poaceae         | Grass     | C3 | Ggeese       | Vert   |
| Gauthier et al. 2004          | Freshwater | Herbivory         | Productivity | Grasses                            | Poaceae         | Grass     |    | Geese        | Vert   |
| Gedan et al. 2009             | Brackish   | Herbivory         | Productivity | <i>Spartina patens</i>             | Poaceae         | Grass     | C4 | Nutria       | Vert   |
| Gedan et al. 2009             | Brackish   | salinity          | Productivity | <i>Spartina patens</i>             | Poaceae         | Grass     | C4 |              | Vert   |
| Geho et al. 2007              | Brackish   | Herbivory         | Productivity | <i>Acer rubrum</i>                 | Aceraceae       | Grass     | C3 |              | Vert   |
| Geho et al. 2007              | Brackish   | Herbivory         | Productivity | <i>Acorus calamus</i>              | Acoraceae       | Grass     | C3 |              | Vert   |
| Geho et al. 2007              | Brackish   | Herbivory         | Productivity | <i>Cephalanthus occidentalis</i>   | Rubiaceae       | Tree      | C3 |              | Vert   |
| Geho et al. 2007              | Brackish   | Herbivory         | Productivity | <i>Cladium mariscoides</i>         | cyperaceae      | Grass     | C3 |              | Vert   |
| Geho et al. 2007              | Brackish   | Herbivory         | Productivity | <i>Juncus effusus</i>              | Juncaceae       | Rush      | C3 |              | Vert   |
| Geho et al. 2007              | Brackish   | Herbivory         | Productivity | <i>Nyssa aquatica</i>              | Cornaceae       | Tree      | C3 |              | Vert   |
| Geho et al. 2007              | Brackish   | Herbivory         | Productivity | <i>Panicum hemitomon</i>           | poaceae         | Grass     | C3 |              | Vert   |
| Geho et al. 2007              | Brackish   | Herbivory         | Productivity | <i>Peltandra virginica</i>         | Aceraceae       | Forb/herb | C3 |              | Vert   |
| Geho et al. 2007              | Brackish   | Herbivory         | Productivity | <i>Pontederia cordata</i>          | Pontederiaceae  | Forb/herb | C3 |              | Vert   |
| Geho et al. 2007              | Brackish   | Herbivory         | Productivity | <i>Rhynchospora inundata</i>       | Cyperaceae      | Grass     | C3 |              | Vert   |
| Geho et al. 2007              | Brackish   | Herbivory         | Productivity | <i>Saururus cernuus</i>            | Saururaceae     | Forb/herb | C3 |              | Vert   |
| Geho et al. 2007              | Brackish   | Herbivory         | Productivity | <i>Schoenoplectus americanus</i>   | Cyperaceae      | Sedge     | C3 |              | Vert   |
| Geho et al. 2007              | Brackish   | Herbivory         | Productivity | <i>Taxodium distichum</i>          | Cupressaceae    | Tree      | C3 |              | Vert   |
| Geho et al. 2007              | Brackish   | Herbivory         | Productivity | <i>Typha domingensis</i>           | Typhaceae       | Forb/herb | C3 |              | Vert   |
| Gough and Grace 1998          | Brackish   | Herbivory         | Productivity | <i>Spartina patens</i>             | Poaceae         | Grass     | C4 |              | Vert   |
| Gough and Grace 1998          | Brackish   | salinity          | Productivity | <i>Spartina patens</i>             | Poaceae         | Grass     | C4 |              | Vert   |
| Gough and Grace 1998          | Brackish   | Herbivory         | Productivity | <i>Schoenoplectus americanus</i>   | Cyperaceae      | sedge     | C3 |              | Vert   |
| Gough and Grace 1998          | Freshwater | salinity          | Productivity | <i>Sagittaria lancifolia</i>       | Alismataceae    | Forb/herb | C3 |              |        |

|                            |            |                   |              |                                    |                |           |    |             |        |
|----------------------------|------------|-------------------|--------------|------------------------------------|----------------|-----------|----|-------------|--------|
| Gough and Grace 1998       | Brackish   | Nitrogen addition | Productivity | <i>Spartina patens</i>             | Poaceae        | Grass     | C4 |             |        |
| Gough and Grace 1998       | Freshwater | Nitrogen addition | Productivity | <i>Sagittaria lancifolia</i>       | Alismataceae   | Forb/herb | C3 |             |        |
| Gough and Grace 1998       | Freshwater | Herbivory         | Productivity | <i>Sagittaria lancifolia</i>       | Alismataceae   | Forb/herb | C3 | Vert        |        |
| Gratton and Denno 2003     | Saline     | Nitrogen addition | Productivity | <i>Spartina alterniflora</i>       | Poaceae        | Grass     | C4 |             |        |
| Guilles Houle et al 1992   | Brackish   | salinity          | Productivity | <i>Aster laurentianus</i>          | Asteraceae     | Forb/herb |    |             |        |
| Gustafson et al. 2006      | Saline     | Herbivory         | Productivity | <i>Spartina alterniflora</i>       | Poaceae        | Grass     | C4 | Snail       | Invert |
| Ho and Pennings 2008       | Brackish   | Herbivory         | Productivity | <i>Iva frutescens</i>              | Asteraceae     | Forb/herb | C3 | Aphids      | Invert |
| Holdregde et al. 2009      | Saline     | Herbivory         | Herbivory    | <i>Spartina alterniflora</i>       | Poaceae        | Grass     | C4 | Crab        | Invert |
| Holm and Sasser 2001       | Freshwater | salinity          | Productivity | <i>Sagittaria lancifolia</i>       | Alismataceae   | Forb/herb | C3 |             |        |
| Howard and Mendelsohn 1999 | Brackish   | salinity          | Productivity | <i>Eleocharis palustris</i>        | Cyperaceae     | Grass     | C3 |             |        |
| Howard and Mendelsohn 1999 | Brackish   | salinity          | Productivity | <i>Panicum hemitomon</i>           | Poaceae        | Grass     | C3 |             |        |
| Howard and Mendelsohn 1999 | Brackish   | salinity          | Productivity | <i>Sagittaria lancifolia</i>       | Alismataceae   | Forb/herb | C3 |             |        |
| Howard and Mendelsohn 1999 | Brackish   | salinity          | Productivity | <i>Schoenoplectus americanus</i>   | Cyperaceae     | sedge     | C3 |             |        |
| Howard and Rafferty 2006   | Saline     | salinity          | Productivity | <i>Distichlis spicata</i>          | Poaceae        | Grass     | C4 |             |        |
| Howard and Rafferty 2006   | Brackish   | salinity          | Productivity | <i>Schoenoplectus californicus</i> | Cyperaceae     | Grass     | C4 |             |        |
| Howard and Rafferty 2006   | Saline     | salinity          | Productivity | <i>Schoenoplectus robustus</i>     | Cyperaceae     | Grass     | C3 |             |        |
| Hunter et al. 2008         | Saline     | Nitrogen addition | Productivity | <i>Salicornia bigelovii</i>        | Chenopidiaceae | Forb/herb | C4 |             |        |
| Hunter et al. 2008         | Brackish   | Nitrogen addition | Productivity | <i>Distichlis spicata</i>          | Poaceae        | Grass     | C4 |             |        |
| Jayatissa et a. 2008       | Saline     | Salinity          | Productivity | Mangrove                           | Rhizophoraceae | Tree      | C3 |             |        |
| Johnson and Jessen 2008    | Saline     | Herbivory         | Productivity | <i>Spartina alterniflora</i>       | Poaceae        | Grass     | C4 | Grasshopper | Invert |
| Juan A. Amat 1995          | Brackish   | Herbivory         | Productivity | <i>Scirpus litoralis</i>           | Cyperaceae     | Sedge     | C4 | Geese       | Vert   |
| Juan A. Amat 1995          | Brackish   | Herbivory         | Productivity | <i>Scirpus maritimus</i>           | Cyperaceae     | Sedge     | C4 | Geese       | Vert   |
| Kao et al. 2001            | Saline     | Salinity          | Productivity | <i>Kandelia candel</i>             | Rhizophoraceae | Tree      | C3 |             |        |
| Kao et al. 2001            | Saline     | Nitrogen addition | Productivity | <i>Kandelia candel</i>             | Rhizophoraceae | Tree      | C3 |             |        |
| Konisky and Burdick 2004   | Saline     | salinity          | Productivity | <i>Spartina alterniflora</i>       | Poaceae        | Grass     | C4 |             |        |
| Konisky and Burdick 2004   | Brackish   | salinity          | Productivity | <i>Spartina patens</i>             | Poaceae        | Grass     | C4 |             |        |
| Konisky and Burdick 2004   | Brackish   | salinity          | Productivity | <i>Juncus gerardi</i>              | Juncaceae      | Rush      | C3 |             |        |
| Konisky and Burdick 2004   | Brackish   | salinity          | Productivity | <i>Phragmites australis</i>        | Poaceae        | Grass     | C3 |             |        |

|                           |          |                      |              |                                 |                    |           |    |                                          |        |
|---------------------------|----------|----------------------|--------------|---------------------------------|--------------------|-----------|----|------------------------------------------|--------|
| Konisky and Burdick 2004  | Brackish | salinity             | Productivity | <i>Typha augustifolia</i>       | Typhaceae          | Perenial  | C3 |                                          |        |
| Konisky and Burdick 2004  | Brackish | salinity             | Productivity | <i>Lythrum salicaria</i>        | Lythraceae         | Forb/herb | C3 |                                          |        |
| Kuhn and Zedler 1997      | Saline   | Salinity             | Productivity | <i>Salicornia subterminalis</i> | Chenopida-<br>ceae | Forb/herb | C3 |                                          |        |
| Kuhn and Zedler 1997      | Brackish | Salinity             | Productivity | <i>Polypogon monspeliensi</i>   | Poaceae            | Grass     | C3 |                                          |        |
| Levine et al. 1998        | Brackish | Nitrogen<br>addition | herbivory    | <i>Iva frutescens</i>           | Asteraceae         | Tree      | C3 |                                          |        |
| Levine et al. 1998        | Brackish | Nitrogen<br>addition | Productivity | <i>Iva frutescens</i>           | Asteraceae         | Tree      | C3 |                                          |        |
| Lopex-Hoffman et al. 2007 | Saline   | salinity             | Productivity | <i>Avicennia germinans</i>      | Verbenaceae        | Tree      | C3 |                                          |        |
| McFarlin et al. 2008      | Saline   | Nitrogen<br>addition | Productivity | <i>Spartina alterniflora</i>    | Poaceae            | Grass     | C4 |                                          |        |
| McFarlin et al. 2008      | Saline   | Nitrogen<br>addition | Productivity | <i>Juncus roemerianus</i>       | Juncaceae          | Rush      | C3 |                                          |        |
| McFarlin et al. 2008      | Saline   | Nitrogen<br>addition | Herbivory    | <i>Spartina alterniflora</i>    | Poaceae            | Grass     | C4 | Grasshopper                              | Invert |
| McFarlin et al. 2008      | Saline   | Nitrogen<br>addition | Herbivory    | <i>Juncus roemerianus</i>       | Juncaceae          | Rush      | C3 | Grasshopper                              | Invert |
| McHugh and Dighton 2004   | Brackish | salinity             | Productivity | <i>Spartina cynosuroides</i>    | Poaceae            | Grass     | C4 |                                          |        |
| McHugh and Dighton 2004   | Saline   | salinity             | Productivity | <i>Spartina alterniflora</i>    | Poaceae            | Grass     | C4 |                                          |        |
| McKee and Rooth 2008      | Saline   | Nitrogen<br>addition | Productivity | <i>Avicennia germinans</i>      | Verbenaceae        | Tree      | C3 |                                          |        |
| McKee and Rooth 2008      | Saline   | Nitrogen<br>addition | Productivity | <i>Spartina alterniflora</i>    | Poaceae            | Grass     | C4 |                                          |        |
| Moon and Stiling 2002     | Saline   | Nitrogen<br>addition | Productivity | <i>Spartina alterniflora</i>    | Poaceae            | Grass     | C4 |                                          |        |
| Moon and Stiling 2002     | Brackish | Nitrogen<br>addition | Productivity | <i>Borrachia frutescens</i>     | Asteraceae         | Shrub     | C3 |                                          |        |
| Moon and Stiling 2004     | Brackish | Nitrogen<br>addition | Herbivory    | <i>Borrachia frutescens</i>     | Asteraceae         | Shrub     | C3 | <i>Pissonotus quadri-<br/>pustulatus</i> | Invert |
| Moon and Stiling 2004     | Brackish | Nitrogen<br>addition | Herbivory    | <i>Borrachia frutescens</i>     | Asteraceae         | Shrub     | C3 | <i>Asphondylia borrichiae</i>            | Invert |
| Moon and Stiling 2004     | Brackish | Nitrogen<br>addition | Herbivory    | <i>Borrachia frutescens</i>     | Asteraceae         | Shrub     | C3 | <i>Argyresthia sp.</i>                   | Invert |
| Moon and Stiling 2004     | Brackish | Nitrogen<br>addition | Herbivory    | <i>Coccoloba uvifera</i>        | Polygonaceae       | Tree      | C3 | Leafminer 1                              | Invert |
| Moon and Stiling 2004     | Brackish | Nitrogen<br>addition | Herbivory    | <i>Coccoloba uvifera</i>        | Polygonaceae       | Tree      | C3 | Leafminer2                               | Invert |
| Moon and Stiling 2004     | Brackish | Nitrogen<br>addition | Herbivory    | <i>Coccoloba uvifera</i>        | Polygonaceae       | Tree      | C3 | <i>Hexeris enhydris</i>                  | Invert |

|                            |            |                   |              |                                  |                |           |    |                               |        |
|----------------------------|------------|-------------------|--------------|----------------------------------|----------------|-----------|----|-------------------------------|--------|
| Moon and Stiling 2004      | Brackish   | Nitrogen addition | Herbivory    | <i>Baccharis halimifolia</i>     | Asteraceae     | Tree      | C3 | <i>Neolasioptera lathamii</i> | Invert |
| Moon and Stiling 2004      | Brackish   | Nitrogen addition | Herbivory    | <i>Baccharis halimifolia</i>     | Asteraceae     | Tree      | C3 | <i>Liriomyza trifolii</i>     | Invert |
| Moon and Stiling 2004      | Brackish   | Nitrogen addition | Herbivory    | <i>Baccharis halimifolia</i>     | Asteraceae     | Tree      | C3 | <i>Amauromyza maculosa</i>    | Invert |
| Cardona-Olarte et al. 2006 | Saline     | salinity          | Productivity | <i>Laguncularia racemosa</i>     | Combretaceae   | Tree      | C3 |                               |        |
| Cardona-Olarte et al. 2006 | Saline     | salinity          | Productivity | <i>Rhizophora mangle</i>         | Rhizophoraceae | Tree      | C3 |                               |        |
| Pennings et al. 2002       | Saline     | Nitrogen addition | Productivity | <i>Spartina alterniflora</i>     | Poaceae        | Grass     | C4 |                               |        |
| Pennings et al. 2002       | Saline     | Nitrogen addition | Productivity | <i>Juncus roemerianus</i>        | Juncaceae      | Rush      | C3 |                               |        |
| Pennings et al. 2002       | Brackish   | Nitrogen addition | Productivity | <i>Distichlis spicata</i>        | Poaceae        | Grass     | C4 |                               |        |
| Pennings et al. 2002       | Brackish   | Nitrogen addition | Productivity | <i>Salicornia virginica</i>      | Chenopidiaceae | Forb/herb | C3 |                               |        |
| Pennings et al. 2002       | Brackish   | Nitrogen addition | Productivity | <i>Borrachia frutescens</i>      | Asteraceae     | Shrub     | C3 |                               |        |
| Pennings et al. 2002       | Brackish   | Nitrogen addition | Productivity | <i>Batis maritima</i>            | Bataceae       |           | C3 |                               |        |
| Pennings et al. 2002       | Brackish   | Nitrogen addition | Productivity | <i>Spartina patens</i>           | Poaceae        | Grass     | C4 |                               |        |
| Pennings et al. 2002       | Brackish   | Nitrogen addition | Productivity | <i>Scirpus olneyi</i>            | Cyperaceae     | Sedge     | C3 |                               |        |
| Pennings et al. 2005       | Brackish   | salinity          | Productivity | <i>Juncus roemerianus</i>        | Juncaceae      | Rush      | C3 |                               |        |
| Pennings et al. 2005       | Saline     | salinity          | Productivity | <i>Spartina alterniflora</i>     | Poaceae        | Grass     | C4 |                               |        |
| Pezeshki and DeLaune 1995  | Saline     | Salinity          | Productivity | <i>Spartina alterniflora</i>     | Poaceae        | Grass     | C4 |                               |        |
| Randall and Foote 2005     | Brackish   | Herbivory         | Productivity | <i>Spartina patens</i>           | Poaceae        | Grass     | C4 |                               | Vert   |
| Randall and Foote 2005     | Brackish   | Herbivory         | Productivity | <i>Schoenoplectus americanus</i> | Cyperaceae     | Sedge     | C3 |                               | Vert   |
| Rickey and Anderson 2004   | Brackish   | Nitrogen addition | Productivity | <i>Phragmites australis</i>      | Poaceae        | Grass     | C3 |                               |        |
| Rickey and Anderson 2004   | Brackish   | Nitrogen addition | Productivity | <i>Spartina pectinata</i>        | Poaceae        | Grass     | C4 |                               |        |
| Sala et al. 2008           | Saline     | Herbivory         | Productivity | <i>Spartina alterniflora</i>     | Poaceae        | Grass     | C4 |                               |        |
| Sala et al. 2008           | Saline     | Nitrogen addition | Productivity | <i>Spartina alterniflora</i>     | Poaceae        | Grass     | C4 |                               |        |
| Schile and Mopper 2006     | Freshwater | salinity          | Productivity | <i>Iris hexagona</i>             | Iridaceae      | Forb/herb | C3 |                               |        |
| Silliman and Bertness 2002 | Saline     | Herbivory         | Productivity | <i>Spartina alterniflora</i>     | Poaceae        | Grass     | C4 | Snail                         | Invert |
| Silliman et al. 2005       | Saline     | Herbivory         | Productivity | <i>Spartina alterniflora</i>     | Poaceae        | Grass     | C4 | Snail                         | Invert |
| Silliman and Zieman 2001   | Saline     | Herbivory         | Productivity | <i>Spartina alterniflora</i>     | Poaceae        | Grass     | C4 | Snail                         | Invert |

|                             |            |                   |              |                              |                    |           |    |                            |        |
|-----------------------------|------------|-------------------|--------------|------------------------------|--------------------|-----------|----|----------------------------|--------|
| Silliman and Zieman 2001    | Saline     | Nitrogen addition | Productivity | <i>Spartina alterniflora</i> | Poaceae            | Grass     | C4 |                            |        |
| Slocum and Mendelssohn 2008 | Brackish   | Herbivory         | Productivity | marsh plants combined        |                    |           |    | Nutria                     | Vert   |
| Slocum and Mendelssohn 2009 | Brackish   | Nitrogen addition | Productivity | marsh plants combined        |                    |           |    |                            |        |
| Spalding and Hester 2007    | Freshwater | salinity          | Productivity | <i>Panicum hemitomom</i>     | Poaceae            | Grass     | C3 |                            |        |
| Spalding and Hester 2007    | Freshwater | salinity          | Productivity | <i>Sagittaria lancifolia</i> | Alismataceae       | Forb/herb | C3 |                            |        |
| Spalding and Hester 2007    | Brackish   | salinity          | Productivity | <i>Spartina patens</i>       | Poaceae            | Grass     | C4 |                            |        |
| Stiling and Moon 2002       | Brackish   | Nitrogen addition | Productivity | <i>Borrachia frutescens</i>  | Asteraceae         | Shrub     | C3 |                            |        |
| Stiling and Moon 2005       | Brackish   | Nitrogen addition | Herbivory    | <i>Borrachia frutescens</i>  | Asteraceae         | Shrub     | C3 |                            |        |
| Stiling and Moon 2005       | Brackish   | Salinity          | Productivity | <i>Borrachia frutescens</i>  | Asteraceae         | Shrub     | C3 |                            |        |
| TA Rand 2004                | Brackish   | Herbivory         | Productivity | <i>Atriplex patula</i>       | Chenopida-<br>ceae | Forb/herb | C3 | <i>Erynephala maritima</i> | Invert |
| Tobler et al. 2006          | Freshwater | Herbivory         | Productivity | <i>Iris hexagona</i>         | Iridaceae          | Forb/herb | C3 | Deer                       | Vert   |
| Touchette 2006              | Brackish   | salinity          | Productivity | <i>Juncus roemerianus</i>    | Juncaceae          | Rush      | C3 |                            |        |
| Traut 2005                  | Brackish   | Nitrogen addition | Productivity | marsh plants combined        |                    |           |    |                            |        |
| Trnka and Zedler 2000       | Saline     | Nitrogen addition | Productivity | <i>Spartina foliosa</i>      | Poaceae            | Grass     | C4 |                            |        |
| Tyler et al. 2007           | Saline     | Nitrogen addition | Productivity | <i>Spartina foliosa</i>      | Poaceae            | Grass     | C4 |                            |        |
| Tyler et al. 2007           | Saline     | Nitrogen addition | Productivity | <i>Salicornia virginica</i>  | Chenopida-<br>ceae | Forb/herb | C3 |                            |        |
| Tyler et al. 2007           | Saline     | Nitrogen addition | Productivity | <i>Spartina alterniflora</i> | Poaceae            | Grass     | C4 |                            |        |
| Tyrell et al. 2008          | Saline     | Herbivory         | Productivity | <i>Spartina alterniflora</i> | Poaceae            | Grass     | C4 | Snail                      | Invert |
| Van Zandt et al. 2003       | Freshwater | salinity          | Productivity | <i>Iris hexagona</i>         | Iridaceae          | Forb/herb | C3 |                            |        |
| Vasquez et al. 2006         | Saline     | salinity          | Productivity | <i>Spartina alterniflora</i> | Poaceae            | Grass     | C4 |                            |        |
| Vasquez et al. 2006         | Brackish   | salinity          | Productivity | <i>Phragmites australis</i>  | Poaceae            | Grass     | C3 |                            |        |
| Vince and Valiela 1981      | Saline     | Nitrogen addition | Productivity | <i>Spartina alterniflora</i> | Poaceae            | Grass     | C4 |                            |        |
| Vince and Valiela 1981      | Brackish   | Nitrogen addition | Productivity | <i>Spartina patens</i>       | Poaceae            | Grass     | C4 |                            |        |
| Wang and Mopper 2008        | Freshwater | Herbivory         | Productivity | <i>Iris hexagona</i>         | Iridaceae          | Forb/herb | C3 | Deer                       | Vert   |
| Wang and Mopper 2008        | Freshwater | salinity          | Productivity | <i>Iris hexagona</i>         | Iridaceae          | Forb/herb | C3 |                            |        |
| White and Alber 2009        | Saline     | salinity          | Productivity | <i>Spartina alterniflora</i> | Poaceae            | Grass     | C4 |                            |        |
| White and Alber 2009        | Brackish   | salinity          | Productivity | <i>Spartina cynosuroides</i> | Poaceae            | Grass     | C4 |                            |        |
| Wigand et al. 2004          | Brackish   | Nitrogen addition | Productivity | <i>Spartina patens</i>       | Poaceae            | Grass     | C4 |                            |        |

|                     |          |                   |              |                              |            |           |    |
|---------------------|----------|-------------------|--------------|------------------------------|------------|-----------|----|
| Wilsey et al. 1992  | Saline   | Nitrogen addition | Productivity | <i>Spartina alterniflora</i> | Poaceae    | Grass     | C4 |
| Woo and Zedler 2002 | Brackish | Nitrogen addition | Productivity | <i>Typha sp.</i>             | Typhaceae  | Perennial | C3 |
| Wu et al. 1998      | Brackish | Salinity          | Productivity | <i>Spartina patens</i>       | Poaceae    | Grass     | C4 |
| Zacheis et al. 2001 |          | Herbivory         | Productivity | <i>Carex ramenskii</i>       | Cyperaceae | Sedge     | C3 |
| Zacheis et al. 2001 | Saline   | Herbivory         | Productivity | <i>Triglochin maritimum</i>  | Juncaceae  | Grass     | C3 |

---



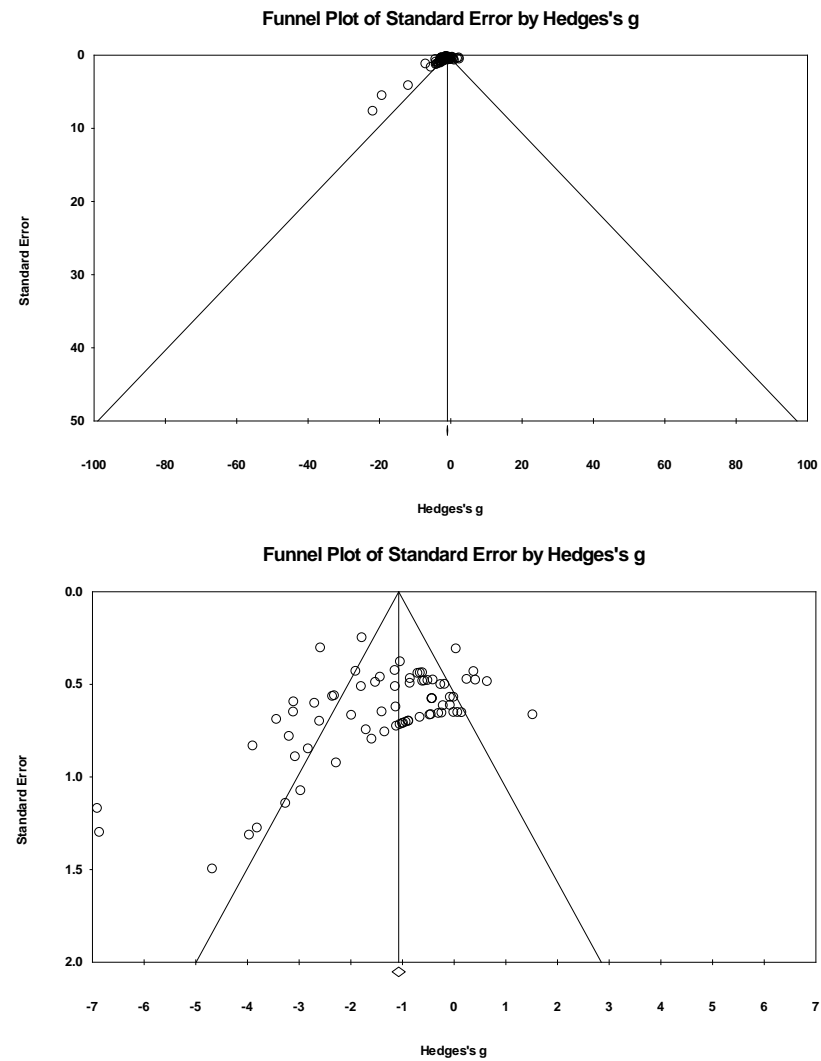

**Figure S1.** Funnel plots of study sizes versus salinity (top) and herbivory (bottom) effect sizes.
